# Supplementary material for: A unique nucleosome arrangement, maintained actively by chromatin remodelers facilitates transcription of yeast tRNA genes
Source: PubMed Central journal article supplement (PMC3698015; doi:10.1186/1471-2164-14-402), 2013-06-17

Figure S3

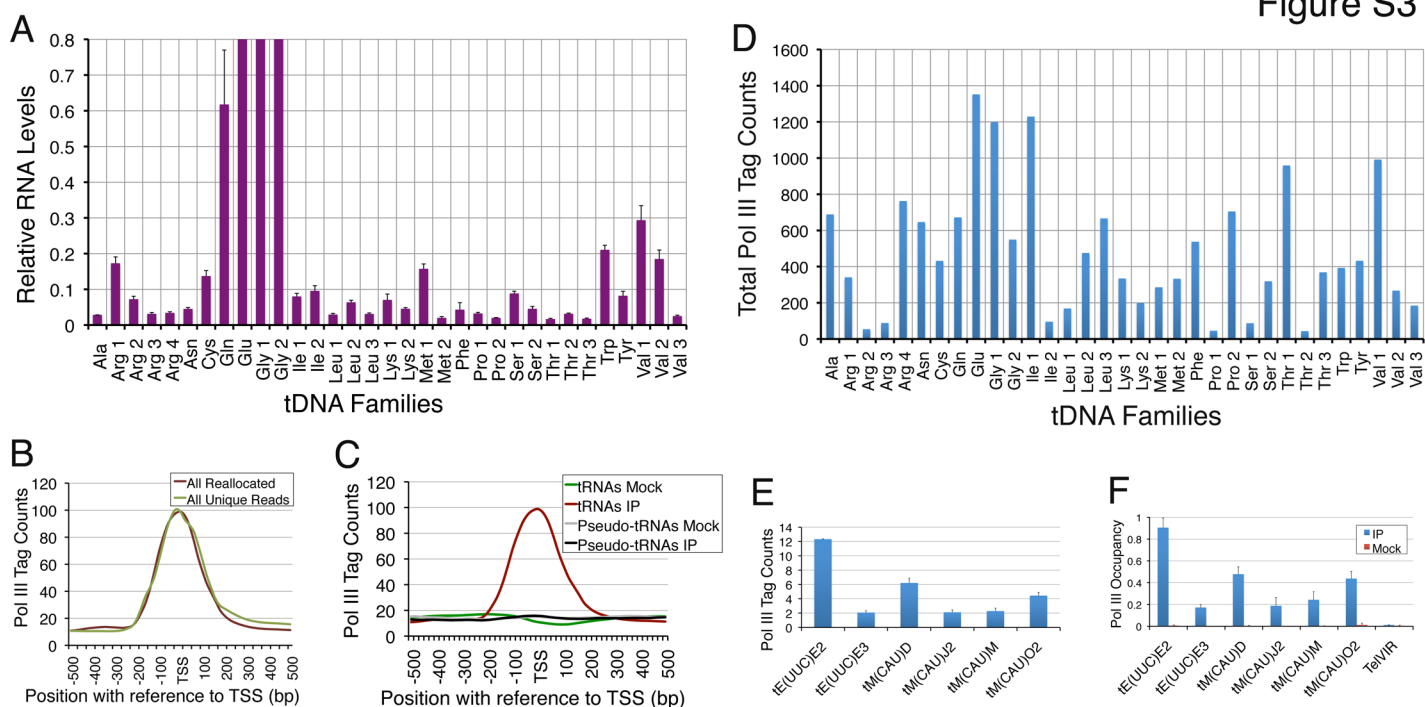

Supplement: 1471-2164-14-402-S3.pdf [file 1471-2164-14-402-S3.pdf]
